# Supplementary material for: Disentangling residence time and temperature sensitivity of microbial decomposition in a global soil carbon model
Source: Copernicus journal article supplement (doi:10.5194/bg-11-6999-2014), 2014-12-11
Supplement: Supplementary file 1 [file bg-11-6999-2014-supplement.zip]

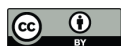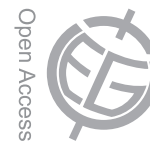

## *Supplement of*

# **Disentangling residence time and temperature sensitivity of microbial decomposition in a global soil carbon model**

**J.-F. Exbrayat et al.**

*Correspondence to:* J.-F. Exbrayat ([j.exbrayat@ed.ac.uk](mailto:j.exbrayat@ed.ac.uk))

- [bg-11-6999-2014-supplement-cover-letter.pdf](#)
- [Exbrayat.Biogeosciences.09Dec2014-SI.pdf](#)
- [orgC\\_0.5deg\\_HWSDv1.21\\_SI.nc](#)
