# Supplementary material for: Disentangling residence time and temperature sensitivity of microbial decomposition in a global soil carbon model
Source: Copernicus journal article supplement (doi:10.5194/bg-11-6999-2014), 2014-12-11
Supplement: Supplementary file 2 [file bg-11-6999-2014-supplement.zip]

Archive with 3 entries (3 files):
- bg-11-6999-2014-supplement-cover-letter.pdf
- Exbrayat.Biogeosciences.09Dec2014-SI.pdf
- orgC_0.5deg_HWSDv1.21_SI.nc
