# Supplementary material for: Disentangling residence time and temperature sensitivity of microbial decomposition in a global soil carbon model
Source: Copernicus journal article supplement (doi:10.5194/bg-11-6999-2014), 2014-12-11
Supplement: Supplementary file 2 [file bg-11-6999-2014-supplement.zip › Exbrayat.Biogeosciences.09Dec2014-SI.pdf]

The attached netCDF file *orgC\_0.5deg\_HWSDv1.21.nc* contains soil organic carbon density (g C m<sup>-2</sup>) data from the Harmonized World Soil Database regridded at a 0.5° × 0.5° spatial resolution used in the paper.

**Table S1.** CMIP5 models used in Figure S1.

|   | Model name     | Institution                                                  |
|---|----------------|--------------------------------------------------------------|
| A | BCC-CSM1.1     | Beijing Climate Center (China)                               |
| B | CanESM2        | Canadian Centre for Climate Modelling and Analysis (Canada)  |
| C | CCSM4          | National Center for Atmospheric Research (USA)               |
| D | GFDL-ESM2G     | Geophysical Fluid Dynamics Laboratory (USA)                  |
| E | GISS-E2-H      | NASA Goddard Institute for Space Studies (USA)               |
| F | GISS-E2-R      |                                                              |
| G | HadGEM2-CC     | Met Office/Hadley Centre (UK)                                |
| H | HadGEM2-ES     |                                                              |
| I | IPSL-CM5A-LR   | Institut Pierre Simon Laplace (France)                       |
| J | IPSL-CM5B-LR   |                                                              |
| K | MIROC-ESM      | Japan Agency for Marine-Earth Science and Technology (Japan) |
| L | MIROC-ESM-CHEM |                                                              |
| M | MPI-ESM-LR     | Max Planck Institute (Germany)                               |
| N | NorESM1-M      | Bjerknes Centre for Climate Research (Norway)                |
| O | NorESM1-ME     |                                                              |

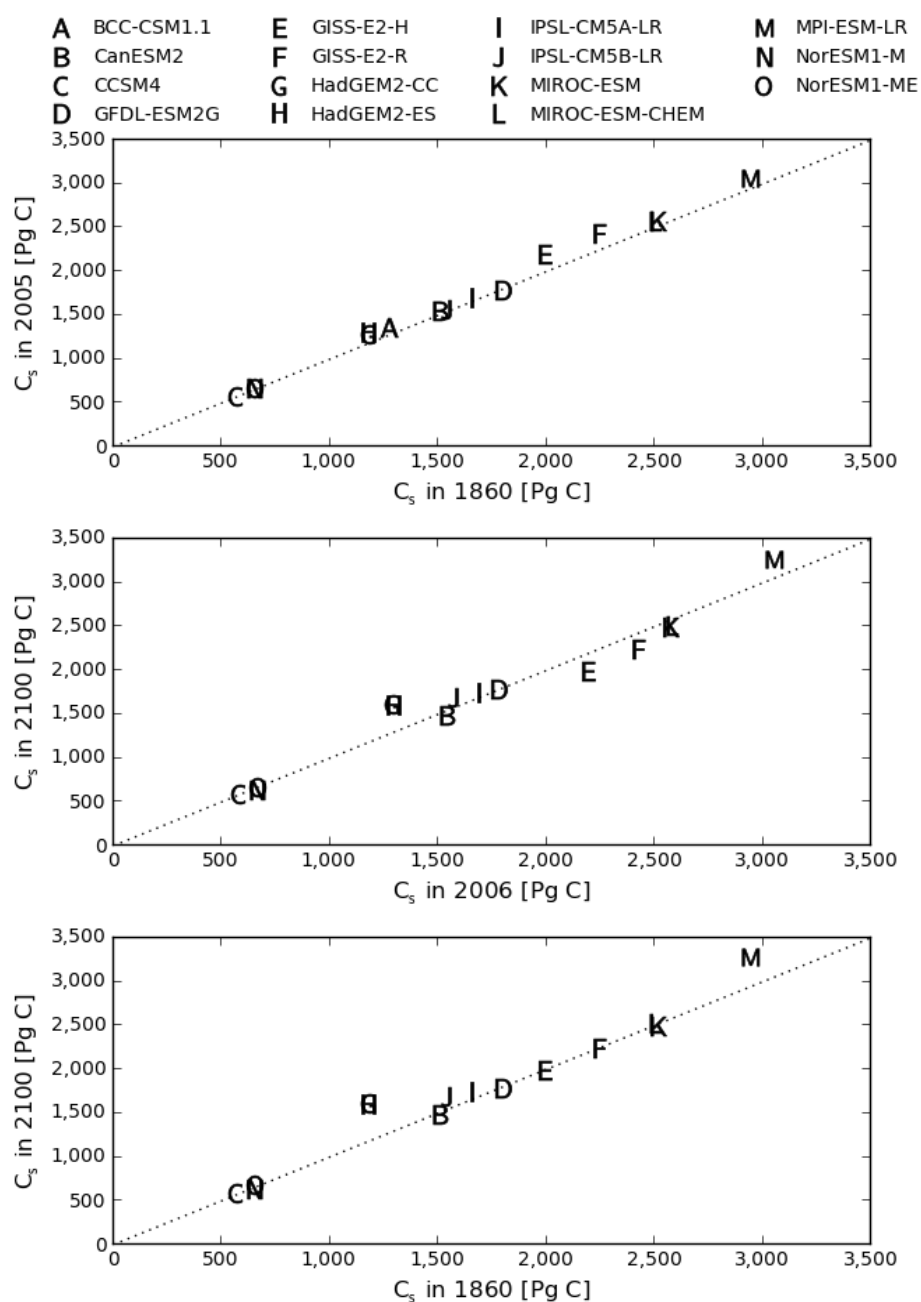

**Figure S1.** Relationship between total soil carbon at two different times in CMIP5 models: present as a function of the past (upper panel), future (RCP 8.5) as a function of the present (middle panel), future as a function of the past (lower panel). Letters correspond to different CMIP5 models as indicated. Values for 1860, 2005 and 2100 were averaged over 1860-1864; 2001-2005 and 2096-2100, respectively. When several realisations of the same model were available, we represent the average of them.
